# Supplementary material for: Human ASXL1 Deficiency Causes Epigenetic Dysfunction, Combined Immunodeficiency and EBV–Associated Hodgkin Lymphoma
Source: bioRxiv or medRxiv preprint supplement (doi:10.1101/2023.12.20.23300096), 2023-12-21
Supplement: Supplementary file [file media-1.pdf]

1  
2  
3  
4  
5  
6  
7  
8  
9  
10  
11  
12  
13  
14  
15  
16  
17  
18  
19  
20  
21  
22  
23  
24  
25  
26  
27  
28  
29  
30  
31  
32  
33  
34  
35  
36  
37  
38  
39  
40  
41  
42  
43  
44  
45

## SUPPLEMENTARY METHODS

### Human ASXL1 Deficiency Causes Epigenetic Dysfunction, Combined Immunodeficiency and EBV-Associated Hodgkin Lymphoma

Maggie P Fu<sup>1\*</sup>, Mehul Sharma<sup>2\*</sup>, Sarah M Merrill<sup>3</sup>, Pariya Yousefi<sup>2</sup>, Ryan Tan<sup>2</sup>, Bhavi P Modi<sup>2</sup>, Kate Del Bel<sup>2</sup>, Rebecca J Deyell<sup>4</sup>, Jacob Rozmus<sup>4</sup>, Wingfield Rehmus<sup>2,5</sup>, Kyla J Hildebrand<sup>2</sup>, Elliot James<sup>2</sup>, Géraldine Blanchard-Rohner<sup>2,6</sup>, Susan Lin<sup>2</sup>, Kevin E Shopsowitz<sup>2,7</sup>, Audi Setiadi<sup>7</sup>, Jefferson Terry<sup>7</sup>, Anna F Lee<sup>7</sup>, Britt I Drögemöller<sup>8,9</sup>, Allison Matthews<sup>1,10</sup>, Maja Tarailo-Graovac<sup>1,11</sup>, Laura Sauvé<sup>2,12</sup>, Hana Mitchell<sup>2</sup>, Julie S Prendiville<sup>2,5</sup>, Julie L MacIsaac<sup>1,13</sup>, Kristy Dever<sup>1,13</sup>, David T S Lin<sup>1</sup>, Mandy Meijer<sup>1,13</sup>, Colin J D Ross<sup>9</sup>, Simon R M Dobson<sup>2,12</sup>, Suzanne M Vercauteren<sup>7</sup>, Wyeth W Wasserman<sup>1</sup>, Clara D M van Karnebeek<sup>2,14,15</sup>, Margaret L McKinnon<sup>2,16</sup>, Michael S Kobor<sup>1,13#</sup>, Stuart E Turvey<sup>2#</sup>, Catherine M Biggs<sup>2#</sup>

<sup>1</sup>British Columbia Children's Hospital, Centre for Molecular Medicine and Therapeutics, Department of Medical Genetics, University of British Columbia, Vancouver, BC, Canada.

<sup>2</sup>Department of Pediatrics, British Columbia Children's Hospital, The University of British Columbia, Vancouver, BC, Canada.

<sup>3</sup>Department of Psychiatry and Human Behavior, The Warren Alpert Medical School at Brown University, Providence, RI, USA.

<sup>4</sup>Division of Pediatric Hematology/Oncology/BMT, Department of Pediatrics, British Columbia Children's Hospital, University of British Columbia, Vancouver, BC, Canada.

<sup>5</sup>Divisions of Pediatric Dermatology, Department of Pediatrics, British Columbia Children's Hospital, University of British Columbia, Vancouver, BC, Canada.

<sup>6</sup>Unit of Immunology and Vaccinology, Division of General Pediatrics, Dept. of Woman, Child, and Adolescent Medicine, Geneva University Hospitals and Faculty of Medicine, University of Geneva, Geneva, Switzerland.

<sup>7</sup>Department of Pathology and Laboratory Medicine, University of British Columbia, Vancouver, BC, Canada.

<sup>8</sup>Department of Biochemistry and Medical Genetics, Rady Faculty of Health Sciences, University of Manitoba, Winnipeg, MB, Canada.

<sup>9</sup>Faculty of Pharmaceutical Sciences, University of British Columbia, Vancouver, BC, Canada.

<sup>10</sup>Department of Paediatrics, University of Toronto, Toronto, Ontario, Canada.

<sup>11</sup>Alberta Children's Hospital Research Institute, Department of Biochemistry and Molecular Biology and Department of Medical Genetics, Cumming School of Medicine, University of Calgary, Calgary, Alberta, Canada.

<sup>12</sup>Pediatric Infectious Diseases, Department of Pediatrics, British Columbia Children's Hospital, University of British Columbia, Vancouver, BC, Canada.

<sup>13</sup>Edwin S.H. Leong Healthy Aging Program, University of British Columbia, Vancouver, Canada.

<sup>14</sup>Departments of Pediatrics and Human Genetics, Emma Center for Personalized Medicine, Amsterdam University Medical Centers, Amsterdam, The Netherlands.

46 <sup>15</sup>Centre for Molecular Medicine and Therapeutics, BC Children's Hospital Research  
47 Institute, Vancouver, Canada.

48 <sup>16</sup>Department of Medical Genetics, University of British Columbia, Vancouver, Canada.

49

50

51 \*These authors contributed equally.

52 #These authors contributed equally.

53

54

55 **Correspondence to:** Catherine M. Biggs, MD, MSc  
56 BC Children's Hospital,  
57 4480 Oak St,  
58 Vancouver, BC, V5Z 4H4, Canada  
59 Phone: 604-875-2118 ext 2  
60 Email: cbiggs@bcchr.ca  
61

## 62 **SUPPLEMENTARY METHODS**

### 63 **Sanger sequencing**

64 Briefly, standard sequencing of genomic DNA from all individuals of the family was  
65 performed to confirm genotype segregation with the disease in the family using the  
66 following primers: Var1: Forward 5'-GAATGACTGCCTTGCTTTAAGA-3', Reverse 5'-  
67 AAAGGTTAGTCCCTAGTGCC-3'; Var2: Forward 5'-TGCCAGATAGCTGTGAAACA-3',  
68 Reverse 5'-CACATTTGGAGATGAGAAACGA-3'.

69

### 70 **Identification of candidate variant**

71 Based on family history and pedigree, once a candidate variant list was generated by  
72 the pipeline, variants identified through the de novo, autosomal recessive, and  
73 compound heterozygous inheritance models were first assessed. All high-impact,  
74 putative loss-of-function (LoF) variants were reviewed. Next, the candidate variant list  
75 was screened for variants in genes associated with inborn errors of immunity (IEI),  
76 especially those previously linked with vaccine-strain rubella-associated granulomas.  
77 Genes associated with DNA repair deficiency disorders as well as telomeropathies were  
78 also investigated.

79 In addition, a phenotype-driven approach was also employed to identify relevant  
80 variants in genes that may be associated with clinical features (using associated MeSH  
81 and HPO terms) presented by the proband, such as multiple skin lesions, necrotizing  
82 granulomatous inflammation (postvaccine rubella strain identification), idiopathic chronic  
83 macrocytosis, low T-cell count, high B-cell count, mild megablastoid changes, mild  
84 dysplastic features, infections, pneumonia, failure to thrive, learning disability, and  
85 subtle dysmorphic features.

86

### 87 **Generation and maintenance of primary patient T-cells and fibroblasts**

88 T-cells were treated with exogenous IL-2 (10 U/mL) and ImmunoCult™ Human  
89 CD3/CD28 T Cell Activator (Cat # 10971; Stemcell, Vancouver, BC, Canada) for 12

90 days and maintained at a concentration of  $10^6$  cells/mL every 2 days. After 12 days,  
91 exogenous IL-2 concentration was increased to 1000 U/mL.

92 To grow fibroblasts, patient skin was incubated with complete DMEM composed of 10%  
93 heat-inactivated FBS (Gibco-BRL Life Technologies, Grand Island, NY, USA; Life  
94 Technologies, Gaithersburg, MD, USA), 2mM L-glutamine (HyClone, Thermo Fisher  
95 Scientific, Waltham, MA, USA), 1mM sodium pyruvate (Gibco-BRL Life Technologies),  
96 and 1× Antibiotic-Antimycotic (Gibco-BRL Life Technologies, Thermo Fisher) for 3  
97 weeks at 37°C or until a confluent monolayer of fibroblasts had formed. Primary  
98 fibroblasts were then lifted and frozen at  $-80^{\circ}\text{C}$  for future assays.

99

#### 100 **Stable expression of ASXL1 using a lentivirus vector**

101 To generate lentivirus vectors, wild-type *ASXL1* (NM\_015338) plasmid (Cat#:  
102 RG219354; OriGene Technologies, Rockville, MD, USA) was cloned into a GFP-tagged  
103 Lenti vector (Cat#: PS100071; OriGene Technologies) using *Ascl* (Cat#: R0558L) and  
104 *MluI*-HF (Cat#: R3198L) (both from New England Biolabs, Ipswich, MA, USA). The  
105 plasmid was packaged using third-generation packaging plasmids and transfected into  
106 HEK293T cells. Culture medium was collected, centrifuged, filtered, concentrated, and  
107 stored at  $-80^{\circ}\text{C}$  until use. Expanded T-cells were infected with lentiviral particles and  
108 expanded in complete RPMI-1640 (GE Healthcare, Chicago, IL, USA) supplemented  
109 with 10% FBS for 9 days.

110

#### 111 **Intracellular flow cytometry in PBMCs, expanded T-cells, and primary fibroblasts**

112 Expanded T-cells were first washed and stained with CD4 BUV563 (Clone: SK3, Cat#  
113 612912; BD Biosciences, Franklin Lakes, NJ, USA), CD8 BUV395 (Clone: RPA-T8,  
114 Cat# 563796; BD Biosciences), and Fixable Viability Stain 780 (Cat#565388; BD  
115 Biosciences) for 15 minutes. Cells were then fixed (fibroblasts were lifted, spun, and  
116 fixed) using BD Cytofix (Cat# 554655; BD Biosciences) for 20 minutes at room  
117 temperature and permeabilized using Perm III for 30 minutes on ice (Cat# 558050; BD  
118 Biosciences). The cells were then stained with either primary antibody for ASXL1 (Cat#  
119 MA5-36238; Thermo Fisher Scientific) or mouse IgG1 isotype control for 1 hour at room

120 temperature in 1× Perm/Wash (Cat# 554723; BD Biosciences). Intracellular staining  
121 was performed separately for H2AK119ub (Cat# 8240S; Cell Signaling Technology,  
122 Danvers, MA, USA) in expanded T-cells. Subsequently, the cells were washed and  
123 stained with goat anti-mouse secondary antibody (Alexa Fluor™ 405, Cat#: A-31553;  
124 Thermo Fisher Scientific) for 30 minutes at room temperature. ASXL1 expression was  
125 then measured using a BD FACSymphony flow cytometer (BD Biosciences) and  
126 analyzed using FlowJo software (BD Biosciences).

127 Detection of pSTAT5 was performed similar to the protocol outlined above in expanded  
128 T-cells and in primary patient peripheral blood mononuclear cells (PBMCs). After  
129 permeabilization, cells were stained with mouse anti-human pSTAT5 (pY694) PE-Cy7  
130 (Cat# 560117; BD Biosciences). The following antibodies were used for extracellular  
131 staining of PBMCs: CD3 FITC (Clone: UCHT1, Cat# 555332; BD Biosciences), CD4  
132 BUV563 (Clone: SK3, Cat# 612912; BD Biosciences), CD8 BUV395 (Clone: RPA-T8,  
133 Cat# 563796; BD Biosciences), CD27 BV605 (Clone: L128, Cat#: 562655; BD  
134 Biosciences), CD45RA BV421 (Clone: HI100, Cat#: 562885; BD Biosciences).

135

### 136 **Clinical-grade flow cytometry**

137 Patient clinical immunophenotyping was carried out on whole blood at an accredited  
138 clinical flow cytometry laboratory according to standard protocols. Briefly, whole blood  
139 was collected and stained using dried antibody reagents (DURAClone tubes; Beckman  
140 Coulter, Brea, CA, USA) according to the manufacturer's recommendations. Panels  
141 focused on the analysis of T-cell subsets (DURAClone IM T Cell Subsets, Cat#:  
142 B53328; Beckman Coulter) and B-cell subsets (DURAClone IM B Cell, Cat#: B53318;  
143 Beckman Coulter). Samples used for the B-cell subsets were washed three times prior  
144 to staining. Aliquots of 100 µL of fresh blood were added to the dried reagent tubes and  
145 incubated in the dark at room temperature for 15 minutes prior to lysis with ImmunoPrep  
146 Reagent System (Beckman Coulter). Samples were then fixed with 1.0 mL of 1%  
147 paraformaldehyde prior to flow cytometry. All flow data were acquired on a Navios flow  
148 cytometer and then analyzed using Kaluza software (Beckman Coulter).

149

**150 DNA extraction for DNA methylation array analysis**

151 Whole blood was collected in Vacutainer® CPT™ Cell Preparation Tubes (Becton  
152 Dickinson, Franklin Lakes, NJ, USA). PBMCs were then isolated by standard Ficoll-  
153 Plaque (GE Healthcare) density centrifugation. Buccal swabs were collected with  
154 Isohelix Buccal Swabs (Cell Projects Ltd., Kent, UK) and Oragene DNA sample  
155 collection kits (DNA Genotek, Kanata, ON, Canada), respectively. Genomic DNA was  
156 extracted from whole blood, PBMCs, and expanded T-cells with DNeasy kits (Qiagen,  
157 Germantown, MD, USA). Buccal DNA was extracted with Isohelix Buccal DNA Isolation  
158 kits (Cell Projects Ltd.). Extracted DNA (750 ng) was subjected to bisulfite conversion  
159 with an EZ-96 DNA Methylation kit (Zymo Research, Irvine, CA, USA), and aliquots of  
160 160 ng were assayed with Infinium HumanMethylationEPIC BeadChip arrays (Illumina,  
161 San Diego, CA, USA).

162

**163 Sample selection for pediatric population reference set**

164 We gathered all cohorts in whole blood, PBMCs, and dried blood spots (DBSs), and  
165 excluded cord blood samples. To ensure consistent data preprocessing and  
166 minimization of batch effects, we used only cohorts for which raw IDAT files were  
167 available in the database. The methylation data and metadata were then compiled  
168 manually. Missing metadata were curated from the GEO data set publications and  
169 included variables such as age, sex, tissue, ethnicity, and disease status. For disease  
170 status, we used the designation of “healthy control” (HC) for samples collected from  
171 individuals without persistent severe health conditions, as described in the cohort  
172 metadata and the associated publication. Only cohorts that included age information  
173 and had samples in the pediatric age range were retained. After quality control (QC),  
174 outlier removal, age matching (6–18 years), and selection for HCs, 725 buccal samples,  
175 452 WB samples, 285 PBMC samples remained.

176

**177 Epigenetic age analysis**

178 The *DNAMAge* function in the `methylock` package was used to estimate all DNAM  
179 ages in parallel.<sup>1</sup> Epigenetic age acceleration (EAA) was calculated by fitting regression

180 of epigenetic age (EA) to chronological age (CA) and extracting the residual,  
181 representing the component of EA that could not be explained linearly by the CA  
182 process, whereas epigenetic age difference (EAD) was defined as the difference  
183 between EA and CA.

184

### 185 **Normalization, QC, and imputation of DNA methylation data**

186 For the analysis of primary tissues, the HC cohorts and patient samples were  
187 preprocessed together. All subsequent analyses were performed in R version 4.0.3 (R  
188 Foundation for Statistical Computing, Vienna, Austria). The IDAT files were normalized  
189 with the *preprocessFunnorm* function in the *minfi* package, which included two types  
190 of normalization: Noob (normalized out-of-band) normalization and functional  
191 normalization.<sup>2,3</sup> The two normalization steps utilized the readings from control and out-  
192 of-band probes to adjust for dye bias from the two-color channels and probe-type bias  
193 from Type I and Type II probes on the arrays, respectively. Samples from the 450k and  
194 EPIC microarrays were normalized separately, and then combined by subsetting to the  
195 shared probes.

196 QC was performed at both sample and probe levels. Samples with bisulfite conversion  
197 rate < 75 or average detection *P*-value > .01 were removed. Three other outlier  
198 detection methods—*detectOutlier* from *lumi*,<sup>4</sup> *outlyx* from *watermelon*,<sup>5</sup> and Z-test on  
199 the first principal component (PC)—were implemented to identify outliers with distinct  
200 methylation patterns. Furthermore, sex prediction was performed with the *getSex*  
201 function in *minfi*. Samples with mismatches in reported and predicted sex were also  
202 removed. Finally, probes in which > 5% of samples had bead count < 3 or an average  
203 detection *P*-value > .05 were filtered out.

204 After QC, the missing values were imputed in a probe-wise manner based on the DNAm  
205 patterns of other probes with the lowest Euclidean distance. The method was  
206 implemented with the *imputeKNN* function in the *impute* package, where *k* = 10.

207

## 208 **Cell type proportion prediction**

209 Cell type proportion of whole blood and PBMC DNAm data were estimated from the  
210 imputed data with the Houseman reference-based prediction method,<sup>6</sup> as implemented  
211 using the *estimateCellCounts2* function from the `FlowSorted.Blood.EPIC` package  
212 with the `FlowSorted.BloodExtended.EPIC` reference.<sup>7</sup> In buccal swabs, cell type  
213 proportion was predicted with the *hepidish* function in the `EpiDISH` package<sup>8</sup>. We  
214 compared the estimated proportion of each cell type between the patient and HCs using  
215 the one-sample *t* test.

216

## 217 **Correcting for variances associated with intersample cellular heterogeneity**

218 Given that the patient shows unique cell type proportions distinct from the HC, it is  
219 essential to adjust for cell type-associated DNAm variation to prevent confounding with  
220 the disease-associated DNAm signature. In the primary tissues, this was accounted for  
221 with a regression model. To overcome the compositional nature of cell type proportion  
222 data, we first transformed the proportion into an isometric log ratio followed by principal  
223 component analysis (PCA) to extract components that capture the variabilities  
224 corresponding to cell type differences, yet are not bounded or correlated. We then fitted  
225 a regression model of the DNAm beta value as a function of the cell type PCs<sup>9</sup> and  
226 extracted the residuals as the cell type-adjusted DNAm values. For the analysis in T-  
227 cells, we accounted for the CD8 proportion directly as a covariate in our EWAS.

228

## 229 **Batch correction**

230 Given that we only included samples for which raw IDAT files were available, we also  
231 had access to the chip ID and position at which each sample was run. We identified  
232 three known sources of batch effect, ie, the array platform (450k or EPIC), chip ID, and  
233 chip row. Therefore, we adjusted the data for these three known batch effects with the  
234 *ComBat* function in the `sva` package,<sup>10</sup> which uses an empirical Bayesian framework to  
235 estimate the batch effect on samples across probes and account for them with a  
236 regression model. Each cohort can also be considered as a batch, but that is often  
237 confounded with different tissues, disease status, and age range, so we did not include



238 cohort as a known batch variable. We confirmed that the batch effect of the three  
239 variables were removed with PCA. Platform ID, chip ID, and chip row were originally  
240 strongly correlated with PC1 through PC5 on Pearson's correlation test (multiple test  
241 adjusted  $P < .001$ ), and most of the effects were removed by *ComBat*. For the T-cell  
242 DNAm data, we accounted for batch in the `limma` regression model, as too few batches  
243 were present, and we did not detect a strong batch effect within each time point.

244

### 245 **Differential DNAm analysis of expanded T-cells**

246 The expanded T-cells for the DNAm arrays were collected over 3 days to capture some  
247 biological and technical variability. In the linear regression model, we accounted for  
248 concomitant variables in our analysis, including sex, age, and technical batch, to  
249 specifically isolate the effect of patient *ASXL1* genotype. We identified 276 769  
250 differentially methylated sites (DMs) with a statistical cutoff with  $P_{adj} \leq .05$  and effect size  
251 (ES) cutoff with  $\Delta\beta > 0.1$ . The same regression model comparing *rescue vs.*  
252 *control* yielded 208,692 DMs passing the statistical and ES thresholds. We then  
253 included flow-derived CD8<sup>+</sup> proportion with other concomitant variables in the model to  
254 account for cellular heterogeneity. With the new model, we no longer observed any DMs  
255 passing the statistical threshold of  $P_{adj} < .05$ , showing that *ASXL1* variants led to an  
256 imbalance in CD4<sup>+</sup> and CD8<sup>+</sup> T-cell proportions, and that *ASXL1* has a strong cell  
257 population-specific effect on DNAm pattern. We relaxed the statistical threshold to  $P_{adj} <$   
258  $.2$  and detected 141,113 DMs. Downstream analysis are performed with this model and  
259 detection threshold.

260

### 261 **Enrichment analysis for differential DNA methylation**

262 Overrepresentation analyses were conducted using the *gometh* function in the  
263 `missMethyl` package to identify enriched ChromHMM chromatin states. The  
264 ChromHMM states were exported from the Roadmap Epigenomics database and  
265 overlapped with the Illumina annotation file for the EPIC arrays.<sup>11</sup> The method accounts  
266 for the background probes on the DNAm arrays to minimize coverage biases. The  
267 probes were annotated to the corresponding genes and the enriched pathways with  
268 multiple test-adjusted  $P < .05$  were identified.

**269 Supplementary Clinical Data****270 Presentation and treatment of EBV-associated Hodgkin lymphoma**

271 Between 10 to 15 years of age the patient presented with a three-month history of  
272 epistaxis and gum bleeding. Mildly reduced platelets with elevated mean platelet  
273 volume, suggestive of peripheral destruction, prompted an abdominal ultrasound which  
274 identified hepatosplenomegaly. A chest CT demonstrated diffuse intrathoracic  
275 lymphadenopathy and baseline positron emission tomography (PET)-CT revealed <sup>18</sup>F-  
276 fluorodeoxyglucose (FDG)-avid disease above and below the diaphragm, pulmonary  
277 nodules, hepatic and splenic lesions with innumerable marrow deposits. An axillary  
278 lymph node biopsy confirmed the diagnosis of stage IVA classical Hodgkin lymphoma,  
279 mixed cellularity subtype with prominent granulomatous inflammation (**Supp Fig 1D**).  
280 She had an associated EBV viremia (EBV viral load 15,529 copies/ml) and  
281 immunohistochemistry of Reed-Sternberg cells from her diagnostic lymph node biopsy  
282 were positive for EBV-encoded RNA (EBER). Bone marrow aspirate and biopsy showed  
283 numerous lymphohistiocytic aggregates, in addition to mild megakaryocytic atypia and  
284 mild red blood cell macrocytosis.

285

286 She received 2 cycles of ABVD (doxorubicin [adriamycin], bleomycin, vinblastine and  
287 dacarbazine) chemotherapy with a partial metabolic response (Deauville 4), and was  
288 then switched to AVD with brentuximab-vedotin, the anti-CD30 antibody, for cycles 3  
289 and 4 due to significant myelosuppression and slow early response. Repeat PET-CT  
290 done after 4 cycles of chemotherapy showed progressive disease with 2 new FDG-avid  
291 lesions (spleen and right humerus). The splenic lesion was biopsied and histology  
292 remained in keeping with classical Hodgkin lymphoma. Following tumour board review,  
293 she initiated immunotherapy with nivolumab, the anti-programmed cell death protein 1  
294 (PD1) antibody. This was complicated by the development of autoimmune thyroiditis,  
295 which was treated with thyroxine. She completed 4 cycles of nivolumab after which  
296 PET-CT re-evaluation was indeterminate with persistent FDG-avid lesions potentially  
297 related to her chronic skin lesions and an intercurrent axillary seroma, but no definitive  
298 disease progression. Six weeks following discontinuation of nivolumab, she began  
299 conditioning for a 9/10 matched unrelated donor hematopoietic stem cell transplant with

300 cyclophosphamide, fludarabine and 200cGy total body irradiation. She received  
301 mycophenolate mofetil and tacrolimus prophylaxis for graft versus host disease (GVHD)  
302 and developed grade 1 GVHD of upper gut and skin which was treated with  
303 corticosteroids. She was discharged on day +34 with full donor chimerism, and remains  
304 well now 6 months post-transplant with healing of her chronic skin lesions.

305 **SUPPLEMENTARY REFERENCES**

306

- 307 1. Pelegi-Siso D, de Prado P, Ronkainen J, Bustamante M, Gonzalez JR.  
308 methylclock: a Bioconductor package to estimate DNA methylation age. *Bioinformatics*  
309 2021;37:1759-60.
- 310 2. Fortin JP, Labbe A, Lemire M, et al. Functional normalization of 450k methylation  
311 array data improves replication in large cancer studies. *Genome Biol* 2014;15:503.
- 312 3. Fortin JP, Triche TJ, Jr., Hansen KD. Preprocessing, normalization and  
313 integration of the Illumina HumanMethylationEPIC array with minfi. *Bioinformatics*  
314 2017;33:558-60.
- 315 4. Du P, Kibbe WA, Lin SM. lumi: a pipeline for processing Illumina microarray.  
316 *Bioinformatics* 2008;24:1547-8.
- 317 5. Pidsley R, CC YW, Volta M, Lunnon K, Mill J, Schalkwyk LC. A data-driven  
318 approach to preprocessing Illumina 450K methylation array data. *BMC Genomics*  
319 2013;14:293.
- 320 6. Houseman EA, Accomando WP, Koestler DC, et al. DNA methylation arrays as  
321 surrogate measures of cell mixture distribution. *BMC Bioinformatics* 2012;13:86.
- 322 7. Salas LA, Zhang Z, Koestler DC, et al. Enhanced cell deconvolution of peripheral  
323 blood using DNA methylation for high-resolution immune profiling. *Nat Commun*  
324 2022;13:761.
- 325 8. Zheng SC, Webster AP, Dong D, et al. A novel cell-type deconvolution algorithm  
326 reveals substantial contamination by immune cells in saliva, buccal and cervix.  
327 *Epigenomics* 2018;10:925-40.
- 328 9. Jones MJ, Islam SA, Edgar RD, Kobor MS. Adjusting for cell type composition in  
329 DNA methylation data using a regression-based approach. *Methods in Molecular*  
330 *Biology* 2017:99-106.
- 331 10. Leek JT, Johnson WE, Parker HS. The sva package for removing batch effects  
332 and other unwanted variation in high-throughput experiments. *Bioinformatics*  
333 2012;28:882-3.
- 334 11. Roadmap Epigenomics C, Kundaje A, Meuleman W, et al. Integrative analysis of  
335 111 reference human epigenomes. *Nature* 2015;518:317-30.
- 336 12. Gatev E, Gladish N, Mostafavi S, Kobor MS. CoMeBack: DNA methylation array  
337 data analysis for co-methylated regions. *Bioinformatics* 2020;36:2675-83.
- 338 13. Awamleh Z, Chater-Diehl E, Choufani S, et al. DNA methylation signature  
339 associated with Bohring-Opitz syndrome: a new tool for functional classification of  
340 variants in ASXL genes. *Eur J Hum Genet* 2022;30:695-702.

341

342

343

344 **Supplementary Figure Legends:**

345

346 **Supp. Figure 1:** A) White blood cell count assessment over time showed normal white  
347 blood cell count. B) Immunoglobulin assessment over time showed low IgG until  
348 initiation of intravenous immunoglobulin (IVIG), low/normal IgM levels and low/normal  
349 IgA levels. C) Skin biopsy performed in childhood (0-10 years of age) from the left thigh.  
350 Tissue section stained with hematoxylin and eosin showing subcutaneous necrotizing  
351 (\*) and nonnecrotizing granulomas (arrowhead). Specific staining for organisms was  
352 negative (not shown). Scale bar: 200  $\mu$ m. D) Micrograph of lymph node indicating  
353 juxtaposed granulomatous inflammation (\*) and classical Hodgkin lymphoma with  
354 Reed–Sternberg cells (arrowheads). Scale bar: 200  $\mu$ m.

355

356 **Supp. Fig. 2:** A) Predicted CADD score (v1.6) and allelic frequency of ASXL1 variants  
357 reported in the gnomAD database (v3). All missense (gray), stop-gained (navy blue), or  
358 frameshift (magenta) variants are plotted. Patient variants are indicated with a triangle.

359

360 **Supp. Fig. 3:** A) Volcano plot of differential DNAm pattern detected in buccal swabs  
361 with linear regression. Delta beta represented the effect size (regression coefficient) of  
362 the patient status variable after accounting for sample age and sex. Magenta points  
363 indicate DMs with increased DNAm in the patient, and turquoise points represent those  
364 with decreased DNAm. The vertical gray line represents the delta-beta = 0.05, and the  
365 horizontal line corresponds to  $P_{adj} = 0.05$ . B) Overlap of differentially methylated CpGs  
366 identified in our whole blood analysis and those associated with Bohring–Opitz  
367 syndrome in a previous study<sup>13</sup>. C) CA and predicted PedBE EA in the patient and HCs.  
368 HC samples are shown in light blue, while patient samples are shown in red. The black  
369 line indicates the best fit line using linear regression of all the sample points. The gray  
370 area corresponds to the 95% confidence interval. D) Telomere length of patient  
371 lymphocytes and granulocytes compared with the reference range in the HC population.

372

373 **Supp. Fig. 4:** A,B) Epigenetic age analysis in expanded T-cells, ( $n = 3$  for patient and  
374 rescued samples). A) Difference in Horvath skin and blood epigenetic age and

375 chronological age. B) Difference in Hannum epigenetic age and chronological age. 0.05,  
376 \*\* $P < .01$ , \*\*\* $P < .001$ , one-way analysis of variance with Dunnett's multiple comparison  
377 test.

378

379 **Supp. Fig. 5: Extended T-cell phenotyping of the index patient.** pSTAT5 response  
380 in the A) memory CD4 T and B) memory CD8 T-cell subsets of patient and control  
381 PBMCs after stimulation with 1, 10, or 100 U/mL IL-2. Patient (purple), family controls  
382 (orange), HCs (light blue). Two different time points of patient samples are presented  
383 with different symbols (triangles and circles). C) Oxidative stress was detected in  
384 expanded CD4<sup>+</sup> and CD8<sup>+</sup> T-cells of the patient and controls (family and HC) by flow  
385 cytometry using CellROX Deep Red reagent. \* $P < .05$ , \*\* $P < .01$ , one-way analysis of  
386 variance and Tukey's post hoc test.

387
